# Supplementary material for: Loading of DOX into a tetrahedral DNA nanostructure: the corner does matter
Source: Royal Society of Chemistry journal article supplement (doi:10.1039/d1na00753j), 2021-12-07
Supplement: d1na00753j1.pdf [file d1na00753j1.pdf]

**Supporting Information for**  
**Loading of DOX into a tetrahedron DNA nanostructure:**  
**The corner does matter**

Yao Xu,<sup>a</sup> Shu-wei Huang,<sup>a</sup> Yu-qiang Ma,<sup>\*a</sup> and Hong-ming Ding<sup>\*b</sup>

<sup>a</sup> National Laboratory of Solid State Microstructures and Department of Physics, Collaborative Innovation Center of Advanced Microstructures, Nanjing University, Nanjing 210093, China. \*E-mail: myqiang@nju.edu.cn

<sup>b</sup> Center for Soft Condensed Matter Physics and Interdisciplinary Research, School of Physical Science and Technology, Soochow University, Suzhou 215006, China.

\*E-mail: dinghm@suda.edu.cn

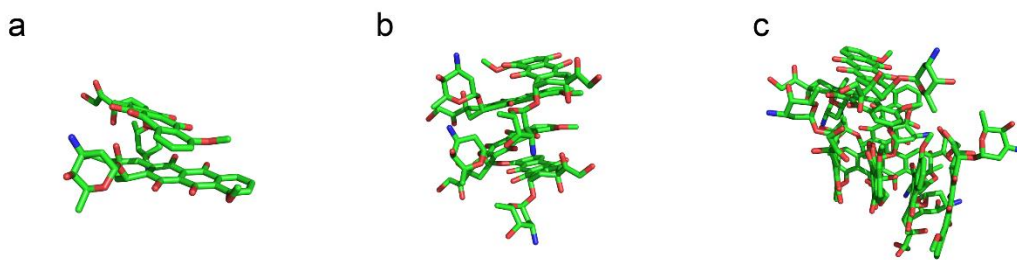

**Figure S1.** Final snapshots for the DOX (a) dimer, (b) tetramer, (c) octamer in the water.

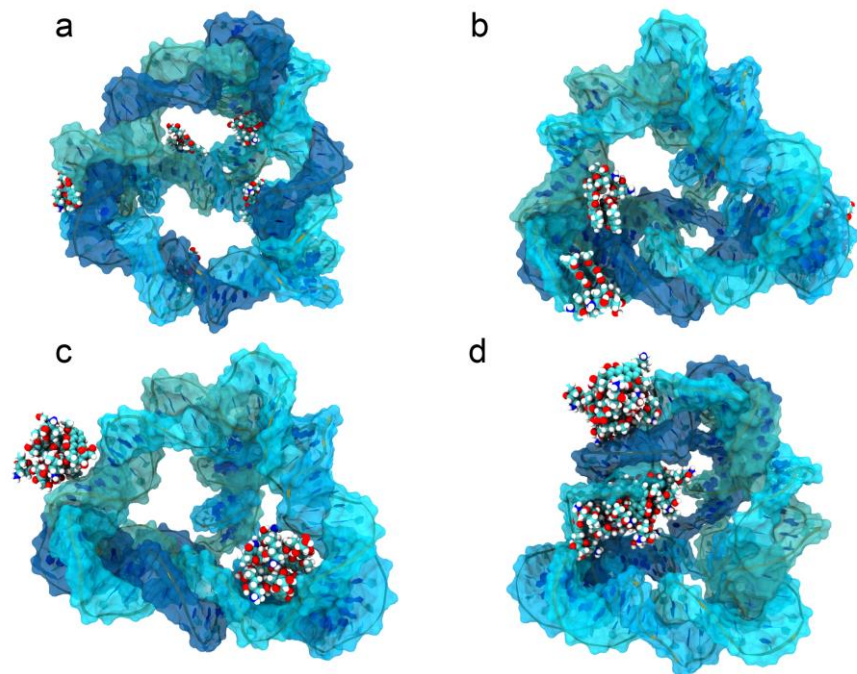

**Figure S2.** Final snapshots illustrating the typical modes in the ionized DOX-TDN-17 interaction: (a) DOX monomer, (b) DOX dimer, (c) DOX tetramer, and (d) DOX octamer.
